# Supplementary material for: Dynamics of topological phonon boundary modes in polymer chains and supramolecular lattices on surfaces
Source: Research Square preprint supplement (doi:10.21203/rs.3.rs-3074097/v1), 2023-09-29
Supplement: Supplementary file 1 [file 9e03aafec35b2a1ea3a6b6dd.docx]

Source Data

Scripts, jupyter notebooks and simulation files (ZIP).

Scripts details

- dispertionrelation_XZ.py: script to obtain the dispersion maps’ arrays, which can be visualised with the jupyter notebooks dispersionrelation_*.ipynb
- PSD_inX_peratom.py: script to obtain the fast Fourier transform of the velocity autocorrelation function per atom (PSD) showed in Figure 3d

Jupyter notebook details

- dispersionrelation_*.ipynb: visualisation of the band structure from MD simulations at finite temperatures obtained using the script dispertionrelation_XZ.py
- normalmodes.maps_*.ipynb: visualization of the eigenmode maps obtained from normal mode analysis
- DynaMatrix_kspace_*.ipynb: band structures from dynamical matrix approach described in Supplementary Methods
- psdXperatoms_COP.ipynb: visualization of the PSD obtained from obtained using the script PSD_inX_peratom.py

Simulation files details

- CHARMM: simulation scripts, parameter files and structural example to reproduce normal mode analysis spectra and trajectories
- GROMACS (GMX): simulation scripts, parameter files and structural examples to reproduce molecular dynamics simulations at finite temperatures
